# Supplementary material
Source: PubMed Central journal article supplement (PMC2939985)
Supplement: NIHMS4159-supplement-1.pdf [file NIHMS4159-supplement-1.pdf]

## SUPPLEMENTARY DATA

### Structural basis for the activation of PPAR $\gamma$ by oxidized fatty acids

<sup>1</sup>Toshimasa Itoh, <sup>1</sup>Louise Fairall, <sup>1</sup>Kush Amin, <sup>2</sup>Yuka Inaba, <sup>3</sup>Attila Szanto, <sup>3</sup>Balint L. Balint, <sup>3,4</sup>Laszlo Nagy, <sup>2</sup>Keiko Yamamoto and <sup>1</sup>John W.R. Schwabe

<sup>1</sup>Henry Wellcome Laboratories of Structural Biology, Department of Biochemistry, University of Leicester, Lancaster Road, Leicester. LE1 9HN. UK.

<sup>2</sup>Laboratory of Drug Design and Medicinal Chemistry, Showa Pharmaceutical University, 3-3165 Higashi-tamagawagakuen, Machida, Tokyo 194-8543, Japan.

<sup>3</sup>Department of Biochemistry and Molecular Biology, Life Sciences Building, Medical and Health Science Center, University of Debrecen, Debrecen, Egyetem ter 1. H-4032 Hungary.

<sup>4</sup>Apoptosis and Genomics Research Group of the Hungarian Academy of Sciences.

Corresponding author: John Schwabe  
Email: js336@le.ac.uk  
Tel: +44 116 229 7030

This PDF file contains:

Supplementary Figure 1

Supplementary Figure 2

Supplementary Methods

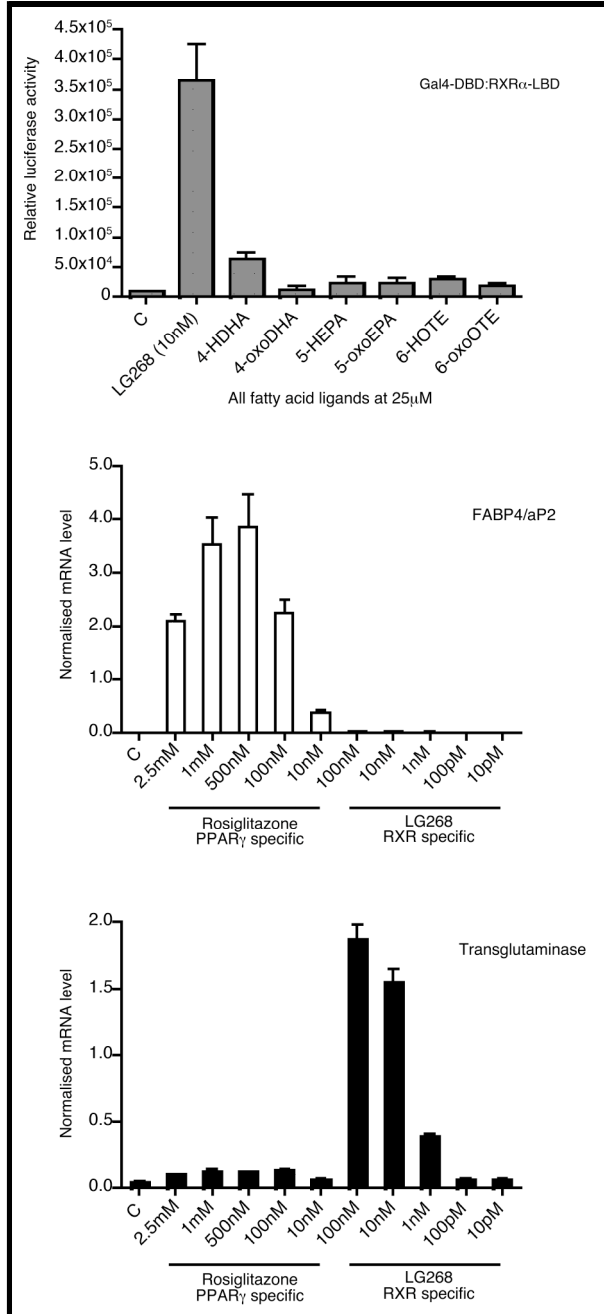

**Supplementary Figure 1: Oxo fatty acids signal through PPAR $\gamma$ .** The top panel shows the activation of a Gal4-DBD:RXR $\alpha$ -LBD chimera by the various oxidized fatty acids. The oxidized fatty acids at 25mM show negligible activation of RXR compared with activation by the RXR specific ligand LG268. The middle and lower panels show that in dendritic cells, Rosiglitazone, but not LG268, results in activation of the FABP4/aP2, whereas LG268, but not Rosiglitazone, activates the RXR-specific target gene transglutaminase. These experiments support the interpretation that PPAR $\gamma$  is the mediator of activation by the various oxidized fatty acids. Error bars indicate s.d.

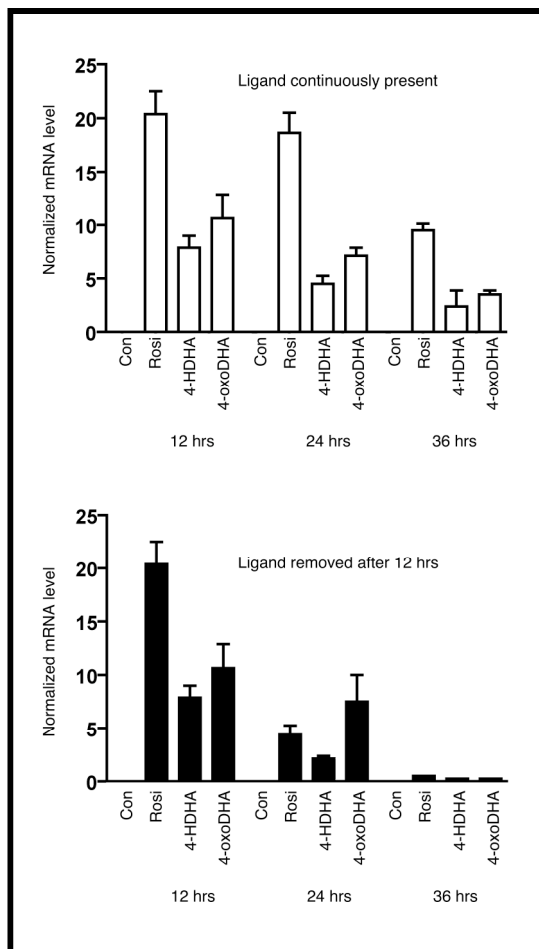

**Supplementary Figure 2: Time course of activation by oxidized fatty acids.** The top panel shows the continuous activation of FABP/aP2 in dendritic cells by Rosiglitazone and oxidized fatty acids. The lower panel shows essentially the same experiment but with the ligand being washed out after 12 hours treatment. Rosiglitazone was used at 1 $\mu$ M and both 4-HDHA and 4-oxoDHA were used at 50 $\mu$ M. Error bars indicate s.d. This experiment suggests that 4-oxoDHA may give a somewhat prolonged response compared with 4-HDHA and Rosiglitazone. Note that these data derive from one experiment. Other experiments did not show a significant difference between covalent and non-covalent ligands. This phenomenon therefore requires further investigation before firm conclusions can be reached.

## Supplementary Methods

**Protein expression and purification.** The human PPAR $\gamma$  LBD (aa 204-477) was expressed using a modified pET30a vector with an N-terminal 6xHis tag cleavable by TEV protease. *E.coli* Rosetta (DE3), was freshly transformed with the plasmid and grown in two flasks containing 0.75L of 2xTY medium with 50  $\mu\text{g ml}^{-1}$  kanamycin and 30  $\mu\text{g/ml}$  chloramphenicol at 37 °C to an OD of 0.1. The cultures were then induced with 40 mM isopropyl- $\beta$ -D-thiogalactopyranoside and further incubated at 20°C for 18h. Cells were harvested and resuspended in 30ml lysis buffer (50 mM Tris pH8, 500 mM NaCl, 1% v/v Triton X-100, 0.1% v/v mercaptoethanol and 1 tablet of Roche complete EDTA free). Cells were lysed by sonication, and the soluble fraction was isolated by centrifugation (18,000 x g for 20 min). The supernatant was applied to Ni-NTA agarose (Qiagen) and the resin thoroughly washed in lysis buffer with an addition 20mM imidazole. The PPAR $\gamma$  LBD was eluted with elution buffer (50 mM Tris pH8, 500 mM NaCl, 300 mM imidazole, 10% v/v glycerol and 0.1% v/v mercaptoethanol). 25 mg of TEV protease was added to the elution and the reaction incubated at RT for 18 h. The protein was dialysed overnight against dialysis buffer (30 mM Tris/Cl pH8, 50 mM NaCl, 5% v/v Glycerol, 1 mM Mercaptoethanol and 0.5 mM EDTA) and then loaded onto a Resource Q (6 ml) column (GE Healthcare) equilibrated with a 20 mM Tris-HCl buffer (pH 7.4) containing 1 mM TCEP and 1 mM AEBSF. The elution was performed by NaCl gradients in the starting buffer 0 to 0.5 M (60mL). The elution fractions were concentrated and loaded onto Superdex 200 gel-filtration column (GE Healthcare) equilibrated with 30 mM Tris/Cl pH8, 50 mM NaCl, 5% v/v Glycerol, 1 mM Mercaptoethanol and 0.5 mM EDTA.. The purified protein was concentrated to 8  $\text{mg ml}^{-1}$ , which was estimated by measuring UV absorbance at 280 nm

**Protein crystallization.** All crystals were obtained through co-crystallization with the relevant ligand. Co-crystallization was performed by vapor diffusion at 22 °C using sitting drop made by mixing 1 mL of protein solution (8  $\text{mg ml}^{-1}$ , in 20 mM Tris, 1 mM TCEP, 0.5mM EDTA, pH 8.0) with 1 mM ligand with 1 ml of reservoir solution (0.7 M sodium citrate, 0.1 M Tris, pH 8.0 or 7.4) under nitrogen atmosphere. The mixture was stored in the dark and prismatic crystals (100 to 200  $\mu\text{m}$ ) appeared after a few days. Crystals were flash-cooled in liquid nitrogen after a fast soaking in a cryoprotectant buffer (reservoir solution with glycerol 17% v/v).
